# Supplementary material for: Neuregulin-1β Improves Uremic Cardiomyopathy and Renal Dysfunction in Rats
Source: PubMed Central journal article supplement — JACC Basic Transl Sci. 2023 May 31;8(9):1160–76. doi: 10.1016/j.jacbts.2023.03.003 (PMC10543921; doi:10.1016/j.jacbts.2023.03.003), 2023-05-31
Supplement: mmc1.pdf [file mmc1.pdf]

# Supplemental Appendix

## Neuregulin-1 $\beta$ improves uremic cardiomyopathy and renal dysfunction in rats

Márta Sárközy MD PhD<sup>a,b</sup>, Simon Watzinger MSc<sup>c</sup>, Zsuzsanna Z.A. Kovács MD PhD<sup>a,b</sup>, Eylem Acar BSc<sup>c</sup>, Fanni Márványkövi MD<sup>a,b</sup>, Gergő Szűcs MD PhD<sup>a,b</sup>, Gülsüm Yilmaz Lauber BSc<sup>c</sup>, Zsolt Galla PharmD PhD<sup>d</sup>, Andrea Siska MSc<sup>e</sup>, Imre Földesi PharmD PhD<sup>e</sup>, Attila Fintha MD PhD<sup>f</sup>, András Kriston MSc<sup>g,h,i</sup>, Ferenc Kovács MSc<sup>g,h,i</sup>, Péter Horváth MSc PhD<sup>g,h,i</sup>, Bence Kővári MD PhD<sup>j</sup>, Gábor Cserni MD PhD DSc<sup>j</sup>, Tibor Krenács MSc PhD DSc<sup>f</sup>, Petra Lujza Szabó MSc PhD<sup>e</sup>, Gábor Tamás Szabó MD PhD<sup>e</sup>, Péter Monostori PharmD PhD<sup>d</sup>, Karin Zins MD PhD<sup>k</sup>, Dietmar Abraham MD PhD DSc<sup>k</sup>, Tamás Csont MD PhD<sup>a,b</sup>, Peter Pokreisz MSc PhD<sup>c</sup>, Bruno K Podesser MD PhD DSc<sup>c</sup>, Attila Kiss MSc PhD<sup>#</sup>

<sup>a</sup>MEDICS Research Group, Department of Biochemistry, Albert Szent-Györgyi Medical School, University of Szeged, H-6720 Szeged, Hungary

<sup>b</sup>Interdisciplinary Center of Excellence, University of Szeged, H-6720 Szeged, Hungary

<sup>c</sup>Ludwig Boltzmann Institute for Cardiovascular Research at Center for Biomedical Research and Translational Surgery, Medical University of Vienna, Vienna, A-1090, Austria

<sup>d</sup>Metabolic and Newborn Screening Laboratory, Department of Pediatrics, Albert Szent-Györgyi Medical School, University of Szeged, H-6720, Hungary

<sup>e</sup>Department of Laboratory Medicine, Albert Szent-Györgyi Medical School, University of Szeged, Szeged, H-6720, Hungary

<sup>f</sup>Department of Pathology and Experimental Cancer Research, Semmelweis University, Budapest, H-1085, Hungary

<sup>g</sup>Synthetic and Systems Biology Unit, Biological Research Centre, Eötvös Loránd Research Network, Szeged H-6726, Hungary

<sup>h</sup>Single-Cell Technologies Ltd, Szeged, H-6726, Hungary

<sup>i</sup>Institute for Molecular Medicine Finland (FIMM), University of Helsinki, Helsinki 00014, Finland

<sup>j</sup>Department of Pathology, Albert Szent-Györgyi Medical School, University of Szeged, Szeged H-6720, Hungary

<sup>k</sup>Center for Anatomy and Cell Biology, Medical University of Vienna, 1090 Vienna, Austria

<sup>#</sup>Corresponding author: Dr. Attila Kiss, e-mail: [attila.kiss@meduniwien.ac.at](mailto:attila.kiss@meduniwien.ac.at); Ludwig Boltzmann Institute for Cardiovascular Research at Center for Biomedical Research and Translational Surgery, Medical University of Vienna, Vienna, Währinger Gürtel 18-20, A-1090, Austria, Tel: 43 660 243 0903, Fax: 43 (0)1 40400 52290

### Table of content

|                             |    |
|-----------------------------|----|
| Supplemental methods .....  | 2  |
| Supplemental Table 1 .....  | 4  |
| Supplemental Table 2 .....  | 5  |
| Supplemental Table 3 .....  | 6  |
| Supplemental Table 4 .....  | 7  |
| Supplemental Table 5 .....  | 8  |
| Supplemental Table 6 .....  | 3  |
| Supplemental Figure 1 ..... | 9  |
| Supplemental Figure 2 ..... | 10 |
| Supplemental Figure 3 ..... | 11 |
| Supplemental Figure 4 ..... | 12 |
| Supplemental Figure 5 ..... | 13 |
| Supplemental Figure 6 ..... | 14 |

## Supplemental Methods

### *Immunostainings for CD68-positive macrophages and type I collagen*

Deparaffinized cardiac tissue sections were immunostained to detect CD68-positive macrophages and type I collagen (COL1). Briefly, dewaxed slides were incubated with monoclonal mouse anti-CD68 antibodies (1:100, ED1, Abcam, Cambridge, MA, USA), then sequentially detected with biotinylated goat anti-mouse secondary antibody (Vector Laboratories, Burlingame, CA, USA) and horseradish peroxidase (HRP) conjugated streptavidin (Dako, Glostrup, Denmark), and finally visualized using 3,3'-diaminobenzidine/hydrogen peroxidase chromogen substrate kit (DAB; Vector Laboratories, Burlingame, CA, USA).<sup>23</sup> Images were captured by a Nikon Eclipse 80i (Tokyo, Japan) microscope.

Type 1 collagen (COL1) was detected using a Ventana Benchmark Ultra automated immunostainer (Roche Diagnostics, Tucson, AR, USA). After antigen retrieval was done in a high pH CC1 buffer for 40 min, and incubation with anti-human type-I collagen IgG (1:1000, #PA5- 95137, ThermoFisher/Invitrogen, Waltham, MA, USA) for 60 min, the detection was performed using the Ultraview system for 40 min and visualized with DAB/hydrogen peroxide kit.<sup>19</sup> Immunostained slides were counterstained with hematoxylin, dehydrated, mounted using DPX (Merck, Darmstadt, Germany), and digitalized with a Panoramic 250 scanner (3DHitech, Budapest, Hungary).

### *SiRNA interference with ErbB3*

*SiRNA interference with ErbB3* was applied to clarify the receptor's role in response to TGF- $\beta$  and rhNRG-1 $\beta$  stimuli in HVCFs. Lyophilized siRNA for ErbB3 was diluted under aseptic conditions to a final concentration of 5 nmol in 5x siRNA buffer (Dharmacon). To evaluate the ideal concentrations of both siRNA and transfection agent (Dharmacon), trial experiments with 6 groups of different concentrations were performed using the fluorescent control siRNA (Supplementary Table 6). The most efficient mixture with the highest fluorescence consisting of 2  $\mu$ l transfection agent and 5  $\mu$ l siRNA was used in each well in 24-well plates. 480  $\mu$ l of antibiotic-free growth medium were added and again mixed carefully. If mediators were applied, they were added to this antibiotic-free growth medium. The final solution was then added to the respective well and incubated for 24 hours.

**Supplemental Table 1** Primer sequences used for RT-qPCR

|              |       |                          |                          |
|--------------|-------|--------------------------|--------------------------|
| <i>Ace1</i>  | rat   | CCCGGCAACTTTTCTGCTGAC    | GATGTTGGTGTCTGTCGCC      |
| <i>Acta2</i> | rat   | ACCATCGGGAATGAACGCTT     | CTGTCAGCAATGCCTGGGTA     |
| <i>Agtr1</i> | rat   | TGCCTCCTCGCCAATGATTC     | CCAGACGTCCTGTCACCTCG     |
| <i>Col 1</i> | rat   | TGTTTGGGTCATTTCCACATGC   | AGCACAAAGCAGTTTTTCCCC    |
| <i>Col 3</i> | rat   | GGCTGAGTTTTATGACGGGC     | GAGCGAGAAGTAGCCAGCTC     |
| <i>ErbB2</i> | rat   | TCAGATTGCCAAGGGGATG      | AACCGGCGTCTGAGAATAG      |
| <i>ErbB3</i> | rat   | CGAGATGGGCAACTCTCAGGC    | AGGTTACCCATGACCACCTCACAC |
| <i>ErbB4</i> | rat   | GGAATATTTGGTCCCCCAGGCTTC | GAGGAGGGCTGTGTCCAATTTCA  |
| <i>Gapdh</i> | rat   | GACAGTCAGCCGCATCTTCT     | GCGCCAATACGACCAAATC      |
| <i>Il6</i>   | rat   | TGAACTCCTTCTCCACAAGCG    | TGGAATCTTCTCCTGGGGGTA    |
| <i>Mmp2</i>  | rat   | AATGCCATCCCCGATAACC      | TCCAAACTTCACGCTCTTCAG    |
| <i>Mmp9</i>  | rat   | AACCAATCTCACCGACAGGC     | CACCACCAACACACCCCTAA     |
| <i>Acta2</i> | human | GCAGCTCCAGCTATGTGTGAAG   | TTGTCCCATTCCCACCATCACC   |
| <i>Col1</i>  | human | AGTCGAGGGCCAAGACGAAG     | ACAACACCTTGCCGTTGTCTG    |
| <i>Col3</i>  | human | GTGGACGTTGGCCCTGTTTG     | TGTCGGTCACTTGCACTGGT     |
| <i>ErbB3</i> | human | GGCAACTCTCAGGCAGGTAA     | CTGAGACCGTGCCCATACC      |
| <i>Lox1</i>  | human | ACCTCATTATCACCTTCCCC     | TGTCTGTCTGTCTGTCTGTC     |
| <i>Gapdh</i> | mouse | ACTCCCACTCTTCCACCTTC     | TCTTGCTCAGTGTCTTGC       |
| <i>Nox2</i>  | mouse | CGGAGGGGCTATTCAATGCT     | CACTGGCTGTACCAAAGGGT     |
| <i>Nox4</i>  | mouse | TTTAGCATTCCCTGCAGCCTC    | AAAGGTTATCTTGCCGCCCA     |
| <i>Nppa</i>  | mouse | GGTACTGGGTCCATTCCTGAG    | GACCTCATCTTCTACCGGCAT    |
| <i>Nppb</i>  | mouse | GGGAGAACACGGCATCATTG     | TCCCAGAGGATAGGAGTGACC    |
| <i>Tnf</i>   | mouse | CCACGTCTGAGCAAACCACC     | GTACAACCCATCGGCTGGCA     |

**Supplemental Table 2** The effect of NRG-1 treatment on serum and urine parameters at week 4 and the endpoint.

| Parameter (unit)                 | week 4          |                  |                            | week 10                      |                                |                              |
|----------------------------------|-----------------|------------------|----------------------------|------------------------------|--------------------------------|------------------------------|
|                                  | Sham            | CKD              | CKD+rhNRG-1 $\beta$        | Sham                         | CKD                            | CKD+rhNRG-1 $\beta$          |
| Urine volume (mL)                | 27 $\pm$ 1.9    | 36 $\pm$ 3.1     | 31 $\pm$ 2.7               | 29 $\pm$ 4.2                 | 31 $\pm$ 3                     | 34 $\pm$ 3.6                 |
| Serum carbamide (mmol/L)         | 5.6 $\pm$ 0.2   | 15 $\pm$ 1.4*    | 13 $\pm$ 0.5*              | 7.2 $\pm$ 0.36               | 18 $\pm$ 3.4*                  | 14 $\pm$ 1.1*                |
| Serum creatinine ( $\mu$ mol/L)  | 30 $\pm$ 1.8    | 67 $\pm$ 4.6*    | 57 $\pm$ 1.6* <sup>#</sup> | 25 $\pm$ 1.3                 | 78 $\pm$ 11* <sup>\$</sup>     | 47 $\pm$ 5.4* <sup>#</sup>   |
| Urine creatinine (mmol/L)        | 4844 $\pm$ 258  | 3467 $\pm$ 353*  | 4177 $\pm$ 313             | 5655 $\pm$ 603               | 4649 $\pm$ 495 <sup>\$</sup>   | 4790 $\pm$ 548               |
| Urine protein (mg/dL)            | 77 $\pm$ 8      | 131 $\pm$ 27     | 110 $\pm$ 15               | 61 $\pm$ 10                  | 371 $\pm$ 90* <sup>\$</sup>    | 191 $\pm$ 44                 |
| Creatinine clearance (mL/min)    | 2.94 $\pm$ 0.14 | 1.28 $\pm$ 0.11* | 1.51 $\pm$ 0.04*           | 4.04 $\pm$ 0.2 <sup>\$</sup> | 1.46 $\pm$ 0.24*               | 2.5 $\pm$ 0.44*              |
| Serum total cholesterol (mmol/L) | 1.49 $\pm$ 0.04 | 2.21 $\pm$ 0.16* | 1.95 $\pm$ 0.08*           | 1.31 $\pm$ 0.08              | 2.60 $\pm$ 0.29* <sup>\$</sup> | 1.90 $\pm$ 0.06*             |
| Serum HDL-cholesterol (mmol/L)   | 1 $\pm$ 0.04    | 1.59 $\pm$ 0.13* | 1.38 $\pm$ 0.07*           | 0.88 $\pm$ 0.05              | 1.73 $\pm$ 0.2*                | 1.28 $\pm$ 0.04*             |
| Serum LDL-cholesterol (mmol/L)   | 0.33 $\pm$ 0.03 | 0.47 $\pm$ 0.04* | 0.39 $\pm$ 0.04            | 0.32 $\pm$ 0.06              | 0.69 $\pm$ 0.09* <sup>\$</sup> | 0.47 $\pm$ 0.04 <sup>#</sup> |
| Serum triglyceride (mmol/L)      | 0.93 $\pm$ 0.14 | 0.73 $\pm$ 0.1   | 0.92 $\pm$ 0.16            | 0.54 $\pm$ 0.04              | 0.89 $\pm$ 0.12*               | 0.76 $\pm$ 0.07              |

Values are presented as mean $\pm$ SEM, \* $p$  < 0.05 vs. sham-operated group and # $p$  < 0.05 vs. CKD group (n=7-10, one-way ANOVA, Holm-Sidak *post hoc* test), <sup>\$</sup> $p$  < 0.05 vs. week 4 value in the same group (n=7-10, Repeated-measures two-way ANOVA, Holm-Sidak *post hoc* test). Creatinine clearance was calculated according to the standard formula (urine creatinine concentration [ $\mu$ M]  $\times$  urine volume for 24 h [mL]) / (serum creatinine concentration [ $\mu$ M]  $\times$  24  $\times$  60 min). Sham: sham-operated group, CKD: chronic kidney disease group, CKD+rhNRG-1 $\beta$ : recombinant human neuregulin-1 $\beta$ -treated chronic kidney disease group.

**Supplemental Table 3** Left ventricular morphological and functional parameters assessed by transthoracic echocardiography at week 2, before the NRG-1 $\beta$  treatment.

| Parameter (unit)                                               | week 2           |                  |                     |
|----------------------------------------------------------------|------------------|------------------|---------------------|
|                                                                | Sham             | CKD              | CKD+rhNRG-1 $\beta$ |
| Anterior wall thickness - systolic (mm)                        | 3.03 $\pm$ 0.13  | 3.20 $\pm$ 0.09  | 3.22 $\pm$ 0.05     |
| Anterior wall thickness - diastolic (mm)                       | 1.69 $\pm$ 0.09  | 1.83 $\pm$ 0.06  | 1.89 $\pm$ 0.05     |
| Inferior wall thickness - systolic (mm)                        | 2.89 $\pm$ 0.13  | 3.22 $\pm$ 0.08  | 3.18 $\pm$ 0.13     |
| Inferior wall thickness - diastolic (mm)                       | 1.73 $\pm$ 0.06  | 1.82 $\pm$ 0.04  | 1.66 $\pm$ 0.04     |
| Posterior wall thickness - systolic (mm)                       | 3.14 $\pm$ 0.17  | 3.36 $\pm$ 0.09  | 3.4 $\pm$ 0.11      |
| Posterior wall thickness - diastolic (mm)                      | 1.71 $\pm$ 0.06  | 1.85 $\pm$ 0.06  | 1.88 $\pm$ 0.09     |
| Septal wall thickness - systolic (mm)                          | 3.19 $\pm$ 0.11  | 3.29 $\pm$ 0.11  | 3.25 $\pm$ 0.03     |
| Septal wall thickness - diastolic (mm)                         | 1.78 $\pm$ 0.07  | 2 $\pm$ 0.08     | 1.9 $\pm$ 0.04      |
| Left ventricular end-diastolic diameter (mm) (cross-sectional) | 7.23 $\pm$ 0.12  | 6.81 $\pm$ 0.12  | 6.65 $\pm$ 0.19     |
| Left ventricular end-systolic diameter (mm) (cross-sectional)  | 3.72 $\pm$ 0.20  | 2.88 $\pm$ 0.14  | 2.59 $\pm$ 0.18     |
| Heart rate (beats/min)                                         | 379 $\pm$ 10     | 398 $\pm$ 6      | 392 $\pm$ 14        |
| Ejection fraction (%)                                          | 55 $\pm$ 3       | 60 $\pm$ 3       | 61 $\pm$ 3          |
| E-velocity (m/s)                                               | 1.07 $\pm$ 0.05  | 1.02 $\pm$ 0.04  | 1.08 $\pm$ 0.05     |
| E'-velocity (m/s)                                              | 0.04 $\pm$ 0.003 | 0.04 $\pm$ 0.002 | 0.04 $\pm$ 0.003    |
| E/E'                                                           | 29 $\pm$ 2.41    | 25.92 $\pm$ 1.46 | 28.28 $\pm$ 2.41    |

Values are presented as mean $\pm$ SEM, \* $p < 0.05$  vs. sham-operated group, and # $p < 0.05$  vs. CKD group (n=7-10, one-way ANOVA, Holm-Sidak *post hoc* test). Sham: sham-operated group, CKD: chronic kidney disease group, CKD+rhNRG-1 $\beta$ : recombinant human neuregulin-1 $\beta$ -treated chronic kidney disease group.

**Supplemental Table 4** Left ventricular morphological and functional parameters assessed by transthoracic echocardiography at week 4 and the endpoint.

| Parameter (unit)                                               | Week 4           |                  |                     | Week 10                   |                                  |                                 |
|----------------------------------------------------------------|------------------|------------------|---------------------|---------------------------|----------------------------------|---------------------------------|
|                                                                | Sham             | CKD              | CKD+rhNRG-1 $\beta$ | Sham                      | CKD                              | CKD+rhNRG-1 $\beta$             |
| Anterior wall thickness - systolic (mm)                        | 3.06 $\pm$ 0.1   | 3.1 $\pm$ 0.05   | 3.19 $\pm$ 0.08     | 2.94 $\pm$ 0.12           | 3.79 $\pm$ 0.2 <sup>s</sup>      | 3.5 $\pm$ 0.11                  |
| Anterior wall thickness - diastolic (mm)                       | 1.75 $\pm$ 0.07  | 1.84 $\pm$ 0.05  | 1.79 $\pm$ 0.06     | 1.78 $\pm$ 0.08           | 2.41 $\pm$ 0.16 <sup>*s</sup>    | 1.93 $\pm$ 0.08 <sup>#</sup>    |
| Inferior wall thickness - systolic (mm)                        | 3.26 $\pm$ 0.15  | 3.51 $\pm$ 0.22  | 3.51 $\pm$ 0.15     | 2.93 $\pm$ 0.13           | 3.77 $\pm$ 0.20                  | 3.45 $\pm$ 0.14                 |
| Inferior wall thickness - diastolic (mm)                       | 1.89 $\pm$ 0.07  | 2.23 $\pm$ 0.27  | 1.94 $\pm$ 0.08     | 1.66 $\pm$ 0.07           | 2.22 $\pm$ 0.13 <sup>*</sup>     | 1.91 $\pm$ 0.1 <sup>#</sup>     |
| Posterior wall thickness - systolic (mm)                       | 3.22 $\pm$ 0.15  | 3.32 $\pm$ 0.13  | 3.4 $\pm$ 0.13      | 3.02 $\pm$ 0.06           | 3.99 $\pm$ 0.15 <sup>*s</sup>    | 3.57 $\pm$ 0.15                 |
| Posterior wall thickness - diastolic (mm)                      | 1.92 $\pm$ 0.08  | 1.92 $\pm$ 0.08  | 1.85 $\pm$ 0.08     | 1.77 $\pm$ 0.05           | 2.33 $\pm$ 0.14 <sup>*s</sup>    | 2.08 $\pm$ 0.08                 |
| Septal wall thickness - systolic (mm)                          | 3.44 $\pm$ 0.14  | 3.32 $\pm$ 0.10  | 3.41 $\pm$ 0.09     | 3.33 $\pm$ 0.07           | 4.03 $\pm$ 0.15 <sup>*s</sup>    | 3.62 $\pm$ 0.13                 |
| Septal wall thickness - diastolic (mm)                         | 1.94 $\pm$ 0.11  | 1.88 $\pm$ 0.08  | 1.9 $\pm$ 0.08      | 1.89 $\pm$ 0.04           | 2.40 $\pm$ 0.11 <sup>*s</sup>    | 2.12 $\pm$ 0.08 <sup>#s</sup>   |
| Left ventricular end-diastolic diameter (mm) (cross sectional) | 7.09 $\pm$ 0.31  | 6.59 $\pm$ 0.22  | 7.02 $\pm$ 0.20     | 7.51 $\pm$ 0.18           | 6.50 $\pm$ 0.18 <sup>*</sup>     | 7.15 $\pm$ 0.18 <sup>#</sup>    |
| Left ventricular end-systolic diameter (mm) (cross sectional)  | 3.30 $\pm$ 0.31  | 2.96 $\pm$ 0.24  | 3.09 $\pm$ 0.28     | 4.11 $\pm$ 0.21           | 2.64 $\pm$ 0.23                  | 3.06 $\pm$ 0.27                 |
| Heart rate (1/min)                                             | 390 $\pm$ 12     | 391 $\pm$ 8      | 379 $\pm$ 9         | 358 $\pm$ 19 <sup>s</sup> | 370 $\pm$ 10 <sup>s</sup>        | 368 $\pm$ 14                    |
| Ejection fraction (%)                                          | 61 $\pm$ 2       | 58 $\pm$ 4       | 58 $\pm$ 2          | 53 $\pm$ 1 <sup>s</sup>   | 56 $\pm$ 2                       | 54 $\pm$ 1                      |
| E-velocity (m/s)                                               | 1.01 $\pm$ 0.06  | 1.04 $\pm$ 0.04  | 1.05 $\pm$ 0.04     | 0.88 $\pm$ 0.07           | 0.99 $\pm$ 0.03                  | 0.93 $\pm$ 0.02                 |
| E'-velocity (m/s)                                              | 0.05 $\pm$ 0.003 | 0.04 $\pm$ 0.001 | 0.04 $\pm$ 0.003    | 0.050 $\pm$ 0.0024        | 0.033 $\pm$ 0.0016 <sup>*s</sup> | 0.041 $\pm$ 0.0030 <sup>#</sup> |
| E/E'                                                           | 22.70 $\pm$ 1.75 | 26.38 $\pm$ 1.82 | 26.85 $\pm$ 1.89    | 18.14 $\pm$ 1.77          | 29.08 $\pm$ 1.70 <sup>*</sup>    | 23.56 $\pm$ 1.95                |

Values are presented as mean $\pm$ SEM, \*p < 0.05 vs. sham-operated group and #p < 0.05 vs. CKD group (n=7-10, one-way ANOVA, Holm-Sidak *post hoc* test), <sup>s</sup>p < 0.05 vs. week 4 value in the same group (n=7-10, Repeated-measures two-way ANOVA, Holm-Sidak *post hoc* test). Sham: sham-operated group, CKD: chronic kidney disease group, CKD+rhNRG-1 $\beta$ : recombinant human neuregulin-1 $\beta$ -treated chronic kidney disease group.

**Supplemental Table 5** Body weight, tibia length, and organ weights at week 10

| Parameter (unit)             | Groups         |                |                           |
|------------------------------|----------------|----------------|---------------------------|
|                              | Sham           | CKD            | CKD+rhNRG-1 $\beta$       |
| Body weight (g)              | 446 $\pm$ 17   | 444 $\pm$ 9    | 452 $\pm$ 6               |
| Tibia length (cm)            | 4.2 $\pm$ 0.03 | 4.3 $\pm$ 0.04 | 4.3 $\pm$ 0.03            |
| Left ventricular weight (mg) | 934 $\pm$ 30   | 1037 $\pm$ 32* | 926 $\pm$ 18 <sup>#</sup> |
| Left kidney weight (mg)      | 1491 $\pm$ 72  | 1669 $\pm$ 97  | 1720 $\pm$ 103*           |
| Lung weight (mg)             | 1676 $\pm$ 88  | 1768 $\pm$ 44  | 1740 $\pm$ 49             |

Values are presented as mean $\pm$ SEM, \* $p < 0.05$  vs. sham-operated group, and # $p < 0.05$  vs. CKD group (n=7-10, one-way ANOVA, Holm-Sidak *post hoc* test). Sham: sham-operated group, CKD: chronic kidney disease group, CKD+rhNRG-1 $\beta$ : recombinant human neuregulin-1 $\beta$ -treated chronic kidney disease group.

**Supplemental Table 6** Groups to evaluate ideal transfection mix and description of the siRNA transfection.

| 1 | 3 | 1 |
|---|---|---|
| 2 | 3 | 2 |
| 3 | 3 | 3 |
| 4 | 5 | 1 |
| 5 | 5 | 2 |
| 6 | 5 | 3 |



Fig. S1

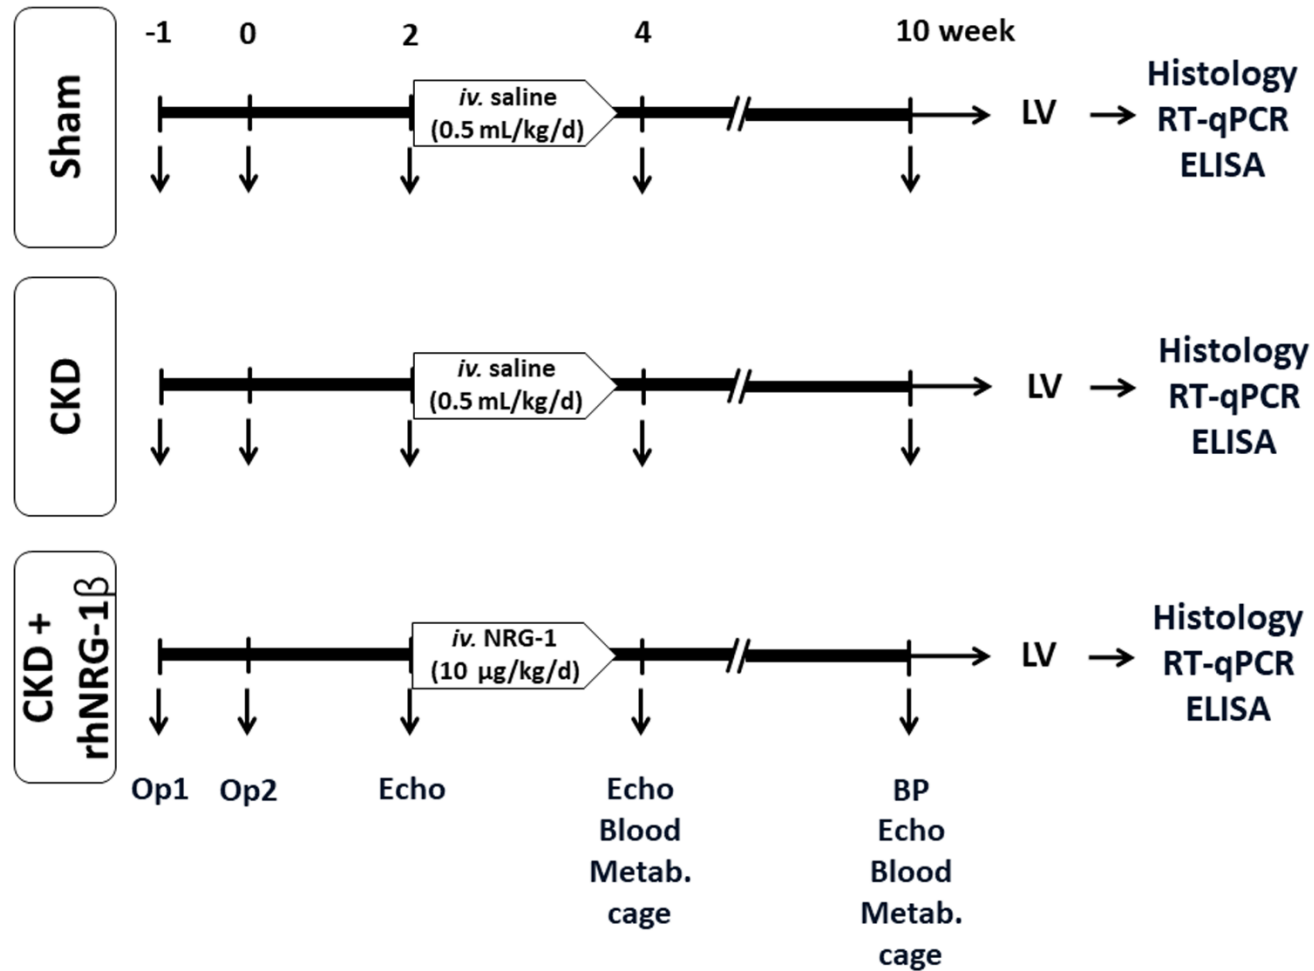

**Supplemental Figure 1** Experimental setup. Blood: blood sampling, BP: blood pressure recording, CKD: chronic kidney disease, Echo: echocardiography, d: day, ELISA: enzyme-linked immunosorbent assay, LV: left ventricle, Metab. cage: metabolic cage, Op: operation, rhNRG-1 $\beta$ : recombinant human neuregulin-1 $\beta$ , RT-qPCR: reverse transcription-quantitative polymerase chain reaction.

Fig. S2

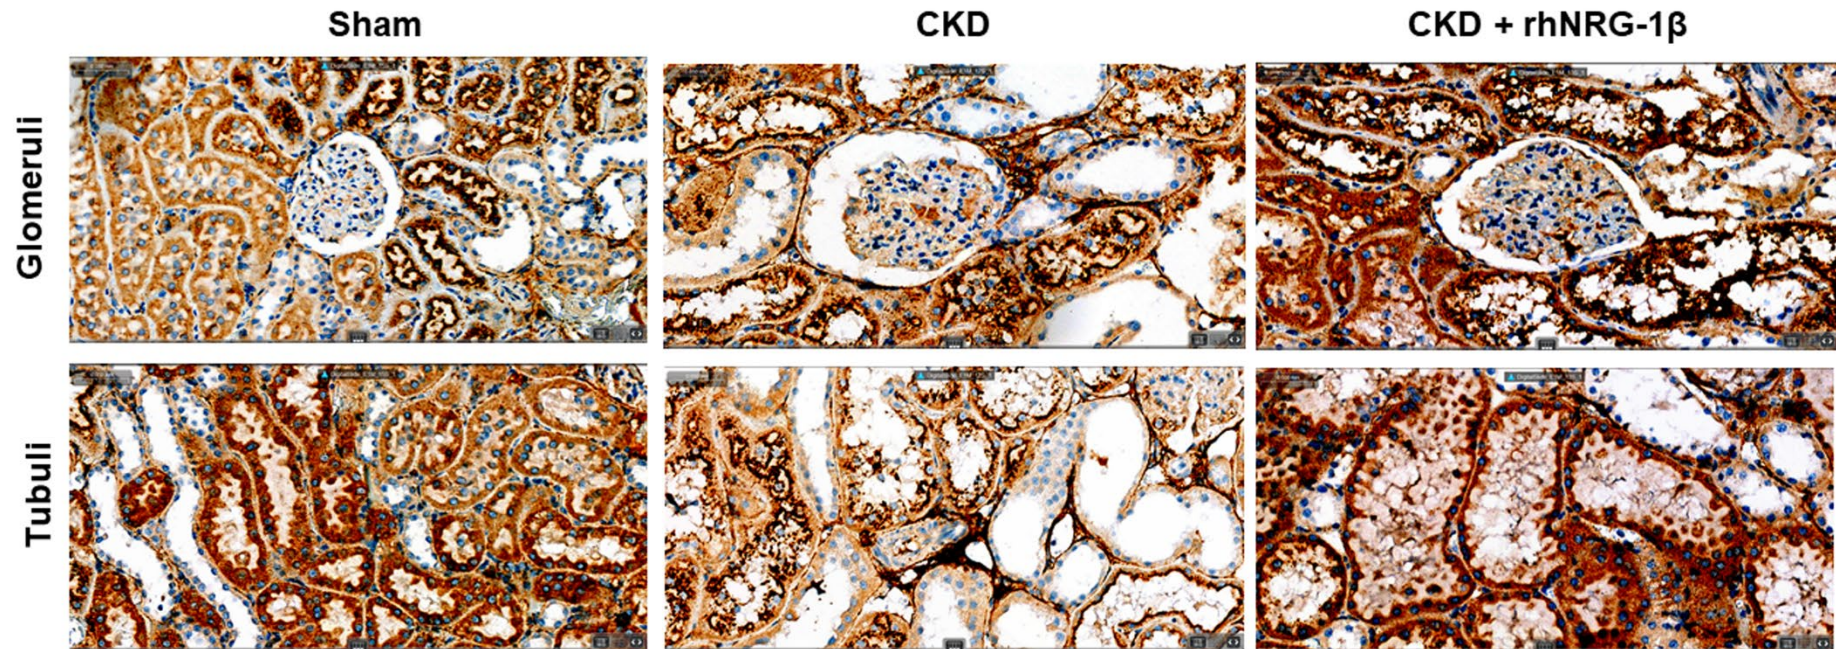

**Supplemental Figure 2** CKD substantially increased the renal expression of collagen. Representative images of collagen type 1 (COL1)-immunostained kidney samples (magnification 30x, scale bar: 50  $\mu$ m). Sham: sham-operated group, CKD: chronic kidney disease group, CKD+rhNRG-1 $\beta$ : recombinant human neuregulin-1 $\beta$ -treated chronic kidney disease group.

Fig. S3

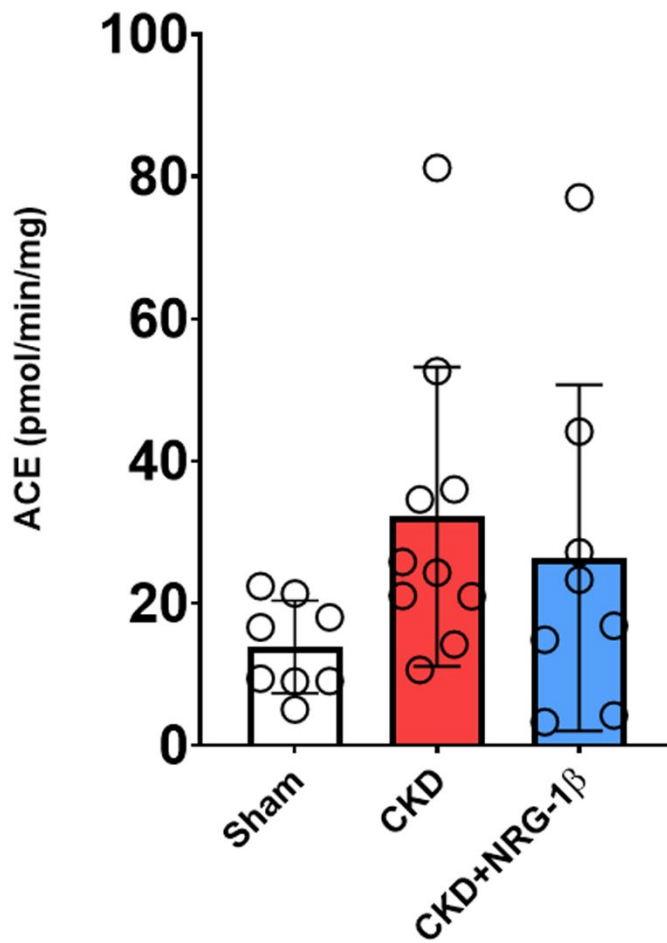

**Supplemental Figure 3** The effects of rhNRG-1 $\beta$  on the renal angiotensin-converting enzyme-1 (ACE1) activity in chronic kidney disease (CKD) after 10 weeks. Data are expressed as mean $\pm$ SEM, n=8-10 replicates/group; one-way ANOVA, Tukey post hoc test. Sham: sham-operated group, CKD: chronic kidney disease group, CKD+rhNRG-1 $\beta$ : recombinant human neuregulin-1 $\beta$ -treated chronic kidney disease group.



**Fig. S4**

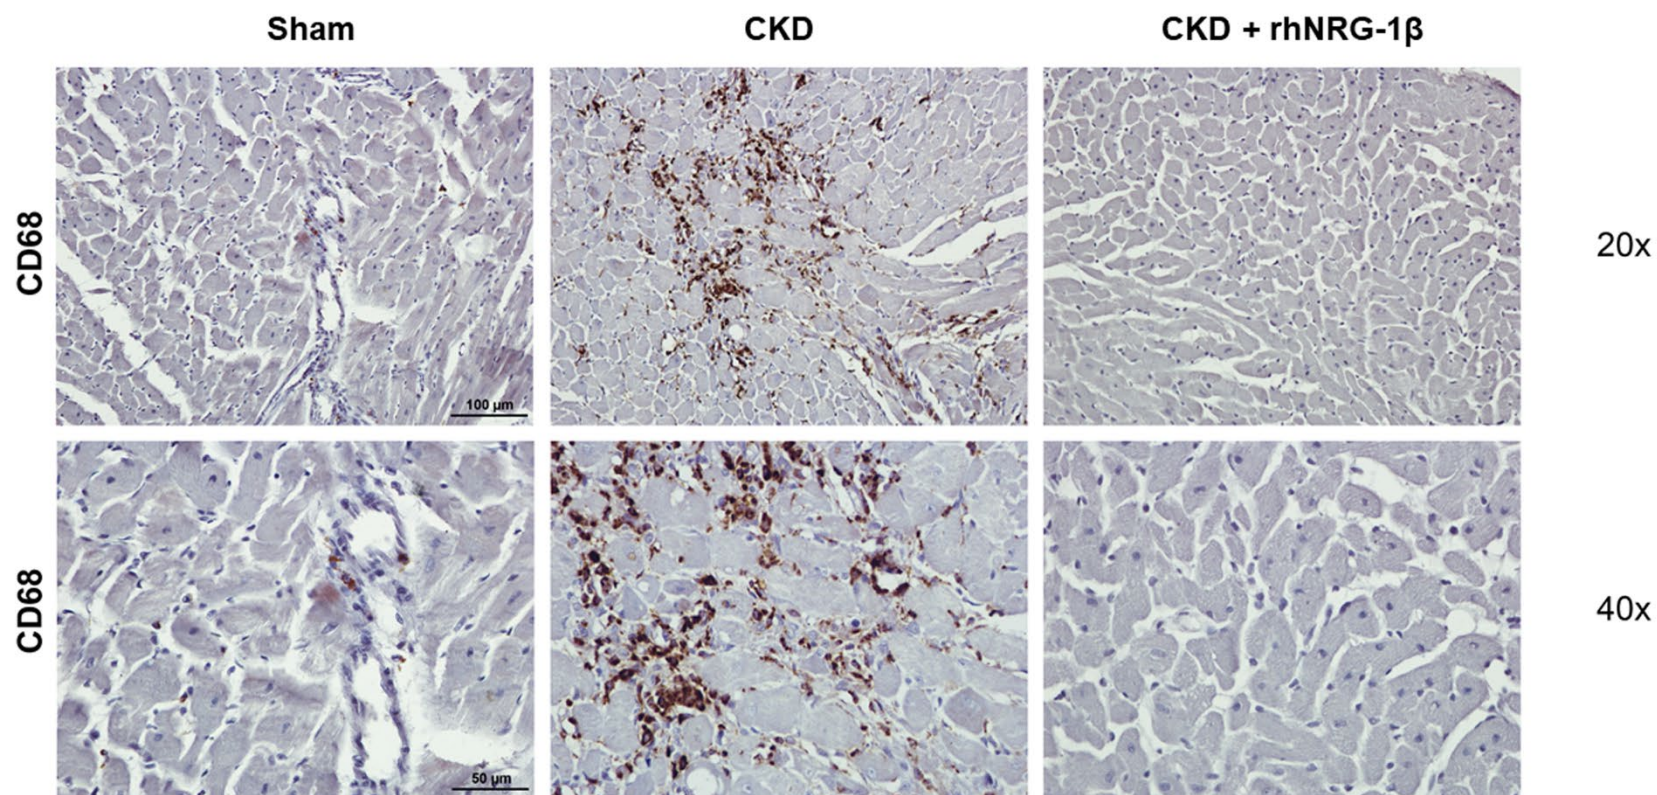

**Supplemental Figure 4** Immunohistochemical assessment have shown a reduced number of CD-68 positive macrophages in the cardiac tissue of CKD-rats following rhNRG-1 $\beta$  treatment. Representative images of CD68-positive macrophages (brown-stained cells) in left ventricular tissue section (objectives 20x and 40x, scale bar: 100 and 50  $\mu$ m, respectively). Sham: sham-operated group, CKD: chronic kidney disease group, CKD+rhNRG-1 $\beta$ : recombinant human neuregulin-1 $\beta$ -treated chronic kidney disease group.

Fig. S5

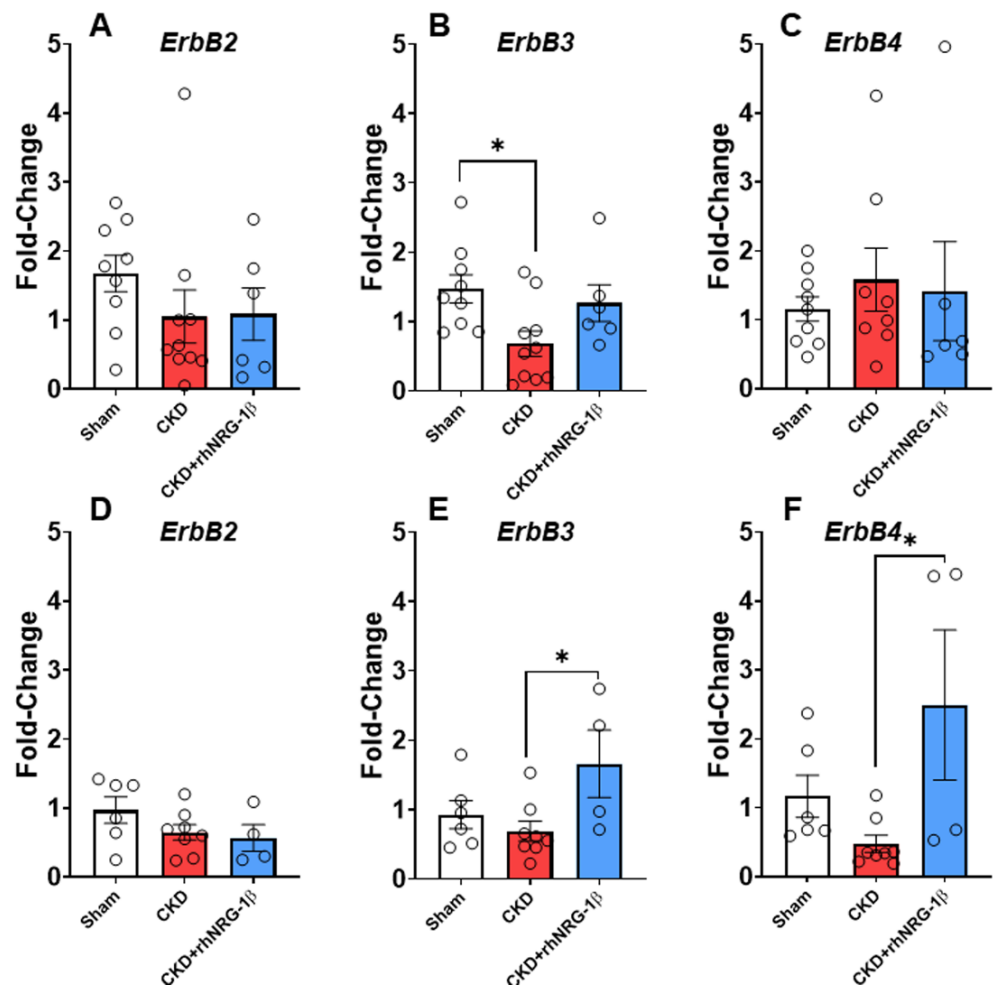

**Supplemental Figure 5** The effects of rhNRG-1β on mRNA expressions of ErbB2-4 receptors in the kidney (A-C) and left ventricular samples (D-E). mRNA expressions of (A and D) *ErbB2*: human epidermal growth factor receptor (HER) 2; (B and E) *ErbB3*: human epidermal growth factor receptor (HER) 3; (C and F) and *ErbB4*: human epidermal growth factor receptor (HER) 4. Data are expressed as mean±SEM.; n=4-8, \*p<0.05, one-way ANOVA, Tukey *post hoc* test. Sham: sham-operated group, CKD: chronic kidney disease group, CKD+rhNRG-1β: recombinant human neuregulin-1β-treated chronic kidney disease group.

Fig. S6

A

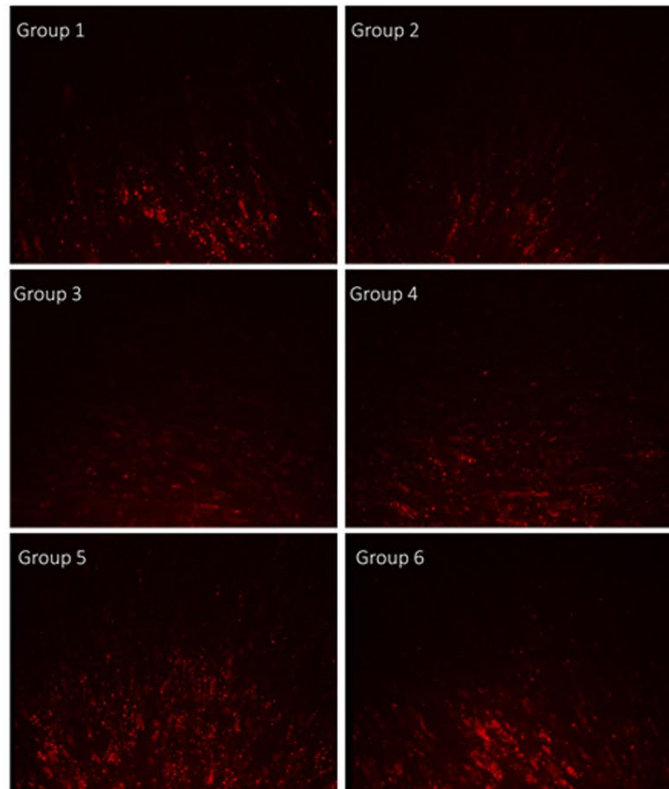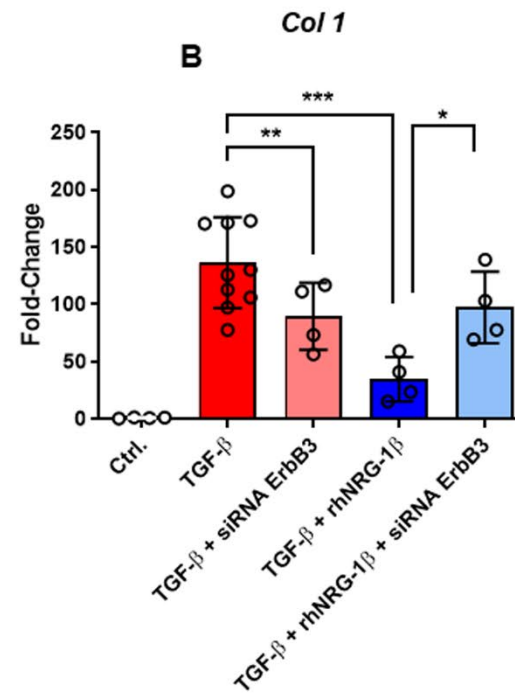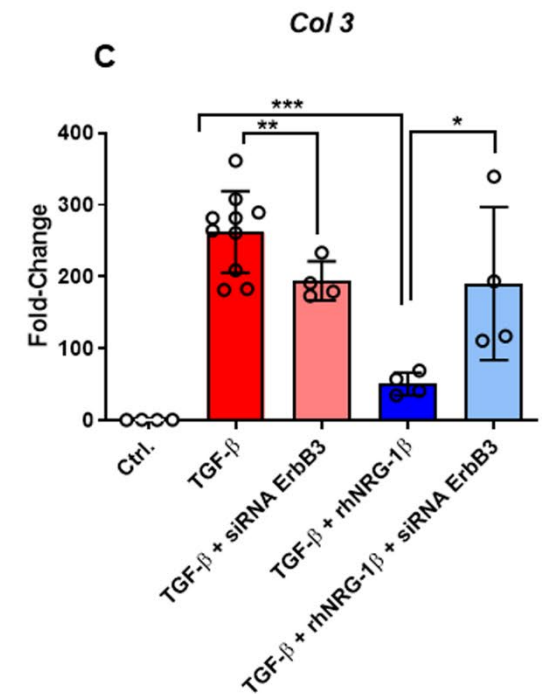

Supplemental Figure 6 Specific siRNA-based interaction with ErbB3 receptor transcripts counteracted the NRG1 $\beta$ -mediated suppression of TGF- $\beta$ -induced collagen expression in human ventricular cardiac fibroblasts. (A) Representative images of siRNA transfection in human ventricular cardiac fibroblasts. Cells

were treated with 3  $\mu\text{L}$  (Group 1-3) or 5  $\mu\text{L}$  of siRNA (5 nmol/L) in combination with 1  $\mu\text{L}$  (Group 1 and 4), 2  $\mu\text{L}$  (Group 2 and 5), or 3  $\mu\text{L}$  (Group 3 and 6) of transfection reagents. (B) The effect of siRNA-ErbB3 with/without TGF- $\beta$  or/and rhNRG-1 $\beta$  on Col 1 and Col 3 mRNA expression in human ventricular cardiac fibroblasts. Data are expressed as mean $\pm$ SEM, n=4-8 replicates/group; \*p<0.05, \*\*p<0.01, and \*\*\*p<0.001, one-way ANOVA, Tukey post hoc test. Col 1: collagen 1; Col 3: collagen; rhNRG-1 $\beta$ : recombinant human neuregulin-1 $\beta$ ; TGF- $\beta$ : Transforming growth factor-beta; siRNA-ErbB3: Small interfering RNA-ErbB3.
